# Supplementary material for: Impact on Education and Ecological Footprint as a Consequence of SARS-CoV-2 in the Perception of the Quality of Teaching Engineering Students in the Brazilian Amazon
Source: MDPI journal article supplement (doi:10.3390/su14169891), 2022-08-10
Supplement: s1 [file s1]

Archive with 1 entries (1 files):
- sustainability-1778292-supplementary.pdf
